# Supplementary material for: Differential kynurenine pathway metabolism in highly metastatic aggressive breast cancer subtypes: beyond IDO1-induced immunosuppression
Source: Springer Nature journal article supplement (doi:10.1186/s13058-020-01351-1), 2020-10-27

# Supplementary fig. 1

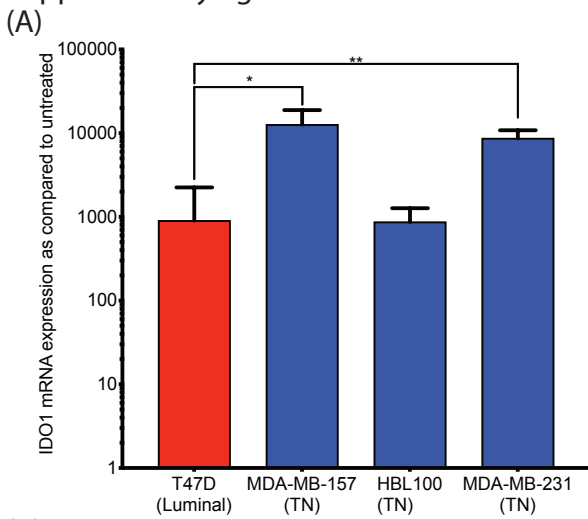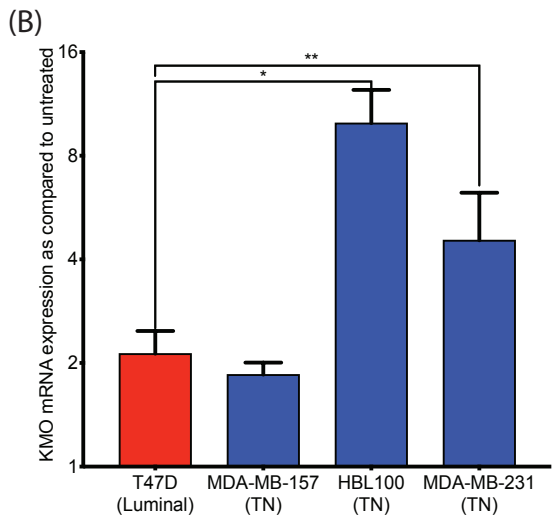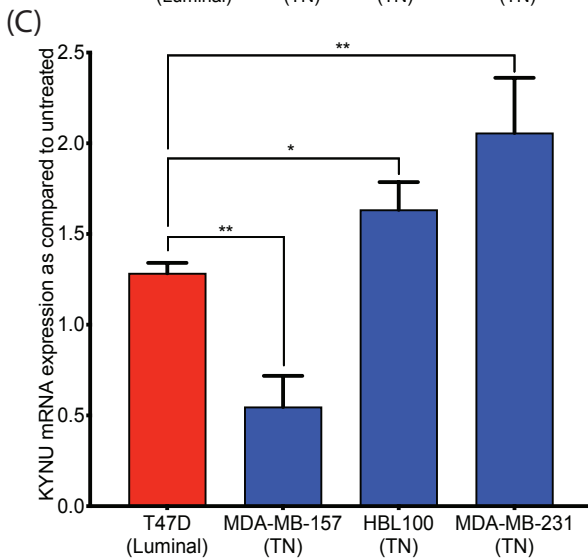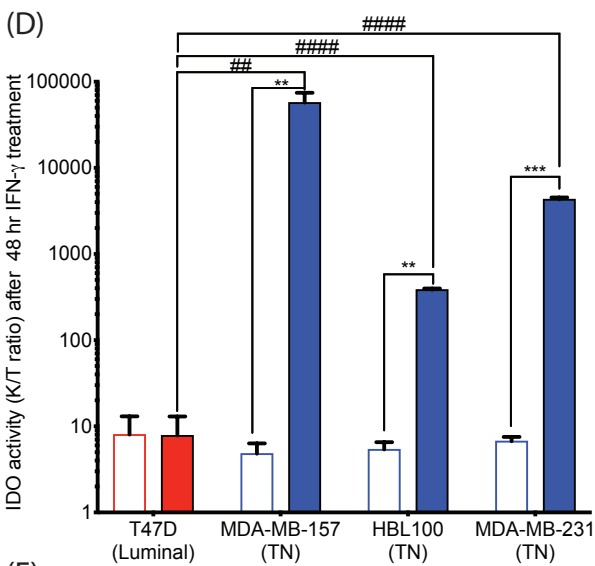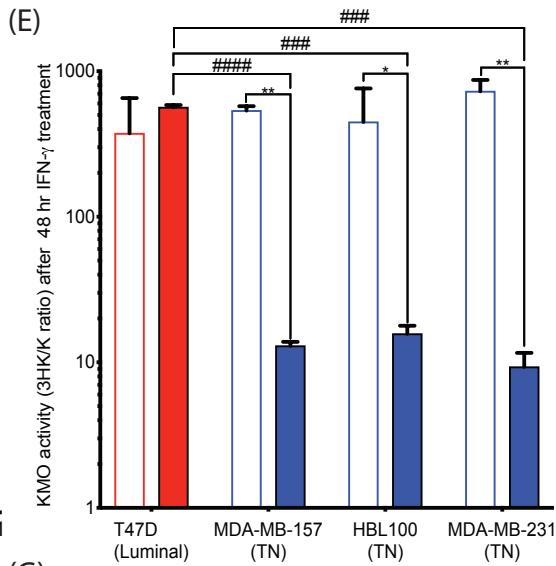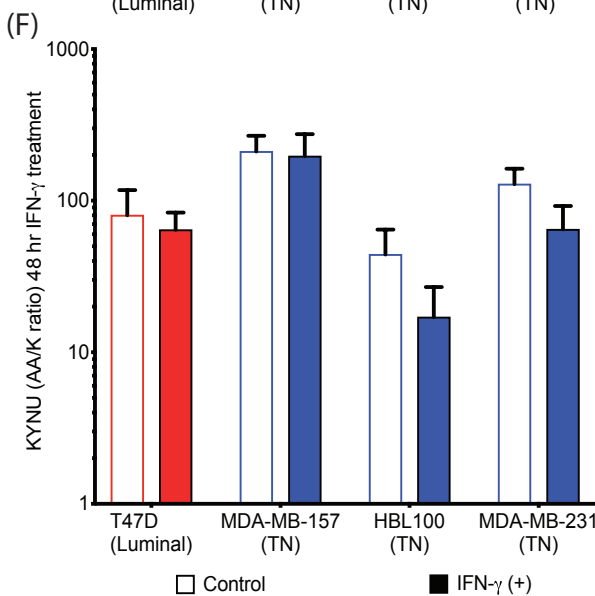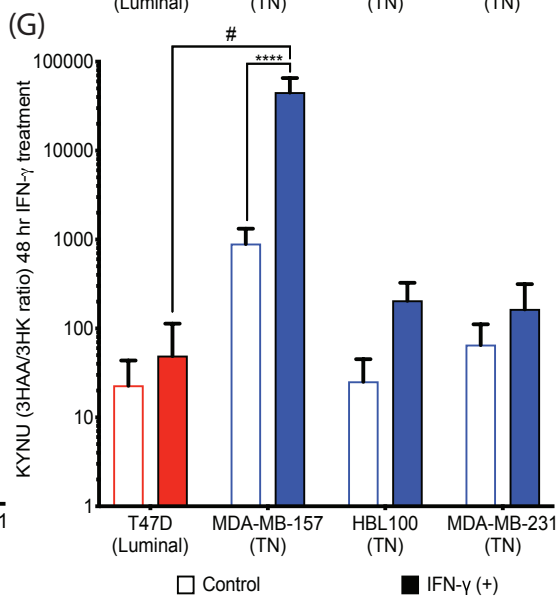

Supplement: MOESM1 [file 18526214]
