# Supplementary material for: Differential kynurenine pathway metabolism in highly metastatic aggressive breast cancer subtypes: beyond IDO1-induced immunosuppression
Source: Springer Nature journal article supplement (doi:10.1186/s13058-020-01351-1), 2020-10-27
Supplement: MOESM2 [file 18526214]

Table 1. Realtime PCR primer details

| Primer name                                          | Primer sequence        | Annealing temperature/efficiency |
|------------------------------------------------------|------------------------|----------------------------------|
| IDO1 forward                                         | GCCAGCTTCGAGAAAGAGTTG  | 55°C / 94%                       |
| IDO1 reverse                                         | TGACTTGTGGTCTGTGAGATGA |                                  |
| KMO forward                                          | TAGCCCTTTCTCATAGAGGACG | 55°C / 99%                       |
| KMO reverse                                          | CTCTCATGGGAATACCTTGGGA |                                  |
| KYNU forward                                         | GGCTCTCCACCTAGATGAGGA  | 60°C / 87%                       |
| KYNU reverse                                         | GCTGCTATTTTGGCCCACTTAT |                                  |
| 3-hydroxyanthranilate 3,4-dioxygenase (3HAO) forward | TATGCCTGGGAGCGAACACA   | 60°C / 99%                       |
| 3HAO reverse                                         | GCAGGAGGGTGGGTGACAAC   |                                  |
| Quinolinic acid phosphoribosyltransferase forward    | GGTCCTGAGCAGCCAACACA   | 60°C / 89%                       |
| QPRT reverse                                         | GAAAGGCTGCCCTGCCAGTA   |                                  |
| TATA-box-binding protein (TBP) forward               | GGGAGCTGTGATGTGAAGT    | 60°C / 95%                       |
| TBP reverse                                          | GGAGGCAAGGGTACATGAGA   |                                  |
| Phosphoglycerate kinase 1 (PGK1) forward             | TCACTCGGGCTAAGCAGATT   | 60°C / 90%                       |
| PGK1 reverse                                         | CAGTGCTCACATGGCTGACT   |                                  |
| Glucose-6-phosphate dehydrogenase (G6PDH) forward    | CCAAGCCCATCCCCTATATT   | 60°C / 90%                       |
| G6PDH reverse                                        | GAATGTGCAGCTGAGGTCAA   |                                  |
